# Supplementary material
Source: PubMed Central journal article supplement (PMC5974794)
Supplement: kfy066_supp.pdf [file kfy066_supp.pdf]

**SUPPLEMENTAL MATERIALS**

**Developmental exposure to a mixture of 23 chemicals associated with unconventional oil and gas operations alters the immune system of C57Bl/6 mice**

Lisbeth A. Boule, Timothy J. Chapman, Sara E. Hillman, Christopher D. Kassotis, Colleen O'Dell, Jacques Robert, Steve N. Georas, Susan C. Nagel, and B. Paige Lawrence

|                     | <b>Control</b> | <b>0.1 µg/mL</b> | <b>p-value<sup>a</sup></b> | <b>1 µg/mL</b> | <b>p-value<sup>a</sup></b> |
|---------------------|----------------|------------------|----------------------------|----------------|----------------------------|
| Time to Parturition | 19.0 ± 0.00    | 18.9 ± 0.18      | 0.89                       | 19.0 ± 0.00    | 1.0                        |
| Dam Weight GD0      | 18.3 ± 0.24    | 18.6 ± 0.48      | 0.82                       | 18.4 ± 0.32    | 0.96                       |
| Dam Weight GD7      | 20.8 ± 0.35    | 21.5 ± 0.47      | 0.39                       | 21.3 ± 0.32    | 0.68                       |
| Dam Weight GD14     | 27.6 ± 0.35    | 29.2 ± 0.69      | 0.14                       | 29.2 ± 0.42    | 0.18                       |
| Dam Weight PND2     | 25.1 ± 0.42    | 26.0 ± 0.48      | 0.28                       | 26.3 ± 0.29    | 0.17                       |

**Supplemental Materials, Table S1. Mean time to parturition and dam body weight before, during, and 2 days after giving birth.** Time to parturition indicates the number of days between gestational day (GD) 0 and birth of pups. Dams were weighed on GD0, 7, 14, and 2 days after parturition (PND2). Data represent the means from 10 dams in each treatment group. <sup>a</sup>Compared to dams drinking control water.

| Cell type                | Female 0.1µg/mL vs. Control |                   |                      | Male 0.1µg/mL vs. Control |                  |                      | Female 1 µg/mL vs. Control |                      | Male 1 µg/mL vs. Control |                      | Female vs. Male Control | Female vs. Male 0.1 µg/mL | Female vs. Male 1µg/mL |
|--------------------------|-----------------------------|-------------------|----------------------|---------------------------|------------------|----------------------|----------------------------|----------------------|--------------------------|----------------------|-------------------------|---------------------------|------------------------|
|                          | Control                     | 0.1µg/mL          | p-value <sup>a</sup> | Control                   | 0.1µg/mL         | p-value <sup>a</sup> | 1 µg/mL                    | p-value <sup>a</sup> | 1 µg/mL                  | p-value <sup>a</sup> | p-value <sup>b</sup>    | p-value <sup>b</sup>      | p-value <sup>b</sup>   |
| <b>MLN Cells</b>         |                             |                   |                      |                           |                  |                      |                            |                      |                          |                      |                         |                           |                        |
| Cell Number              | 7708333 ± 1097424           | 8505000 ± 1137502 | 0.87                 | 5128500 ± 518984          | 4698750 ± 430391 | 0.85                 | 7533150 ± 1040419          | 0.99                 | 5384500 ± 972929         | 0.95                 | 0.36                    | 0.01*                     | 0.15                   |
| CD4 <sup>+</sup> T cells | 1450263 ± 168394            | 128895 ± 179973   | 0.78                 | 637990 ± 90913            | 534007 ± 38120   | 0.64                 | 1281035 ± 150390           | 0.76                 | 667462 ± 107956          | 0.97                 | 0.001*                  | 0.001*                    | 0.005*                 |
| Th2 cells                | 22181 ± 3585                | 27799 ± 3679      | 0.49                 | 7975 ± 1008               | 9084 ± 469       | 0.76                 | 20802 ± 2920               | 0.96                 | 8137 ± 1669              | 0.99                 | 0.003*                  | <0.0001*                  | 0.002*                 |
| Th17 cells               | 25316 ± 3239                | 56982 ± 9006      | 0.008*               | 12343 ± 4758              | 11248 ± 2316     | 0.71                 | 37912 ± 7257               | 0.39                 | 15922 ± 4838             | 0.81                 | 0.001*                  | 0.01*                     | 0.52                   |
| Tregs                    | 117598 ± 12010              | 88245 ± 12673     | 0.26                 | 60761 ± 11006             | 46341 ± 5405     | 0.51                 | 97642 ± 13330              | 0.53                 | 62711 ± 10343            | 0.99                 | 0.01*                   | 0.01*                     | 0.06                   |
| <b>BAL cells</b>         |                             |                   |                      |                           |                  |                      |                            |                      |                          |                      |                         |                           |                        |
| Macrophages              | 44808 ± 8681                | 179845 ± 32636    | 0.002*               | 92538 ± 18232             | 121104 ± 25160   | 0.61                 | 126768 ± 23430             | 0.047*               | 112601 ± 18138           | 0.79                 | 0.69                    | 0.17                      | 0.63                   |
| Eosinophils              | 174123 ± 63817              | 476702 ± 93240    | 0.02*                | 421327 ± 102220           | 662437 ± 150330  | 0.32                 | 305157 ± 45367             | 0.41                 | 538508 ± 72394           | 0.77                 | 0.52                    | 0.32                      | 0.01*                  |
| Neutrophils              | 18141 ± 7747                | 83090 ± 34974     | 0.12                 | 31046 ± 9986              | 35931 ± 9277     | 0.94                 | 49694 ± 10276              | 0.59                 | 40424 ± 13096            | 0.82                 | 0.99                    | 0.19                      | 0.58                   |
| Lymphocytes              | 40426 ± 13250               | 95771 ± 17938     | 0.04*                | 48126 ± 12505             | 71727 ± 24996    | 0.64                 | 54381 ± 11835              | 0.78                 | 56912 ± 12799            | 0.94                 | 0.99                    | 0.45                      | 0.88                   |

**Supplemental Materials, Table S2. The number of immune cell populations in male and female offspring after HDM sensitization and challenge.**

At maturity (6-8 weeks of age), 9-10 female and 9-10 male offspring from each developmental exposure group were sensitized and challenged with house dust mite (HDM). Within each group, offspring of the same sex were from a different treated dam. Flow cytometry was used to identify CD4<sup>+</sup> T cells in the MLN, based on the following parameters: as CD4<sup>+</sup> T cells (CD3<sup>+</sup>CD4<sup>+</sup>); Th2 cells (GATA3<sup>+</sup>CD4<sup>+</sup>); Th17 cells (RORγt<sup>+</sup>CD4<sup>+</sup>); Tregs (Foxp3<sup>+</sup>CD25<sup>+</sup>CD4<sup>+</sup>). Differential cell counting was used to enumerate eosinophils, macrophages, lymphocytes, and neutrophils in the BAL. The mean number of cells ± SEM is shown. <sup>a</sup>Mixture-exposed group compared to control group within the indicated sex. <sup>b</sup>Female versus male offspring of dams given the indicated concentration of the mixture. \*Demarcates  $p \leq 0.05$ .

| Cell type                | Female 0.1 µg/mL vs. Control |             |                      | Male 0.1 µg/mL vs. Control |              |                      | Female 1 µg/mL vs. Control |                      | Male 1 µg/mL vs. Control |                      | Female vs. Male Control | Female vs. Male 0.1 µg/mL | Female vs. Male 1µg/mL |
|--------------------------|------------------------------|-------------|----------------------|----------------------------|--------------|----------------------|----------------------------|----------------------|--------------------------|----------------------|-------------------------|---------------------------|------------------------|
|                          | Control                      | 0.1µg/mL    | p-value <sup>a</sup> | Control                    | 0.1µg/mL     | p-value <sup>a</sup> | 1 µg/mL                    | p-value <sup>a</sup> | 1 µg/mL                  | p-value <sup>a</sup> | p-value <sup>b</sup>    | p-value <sup>b</sup>      | p-value <sup>b</sup>   |
| <b>MLN Cells</b>         |                              |             |                      |                            |              |                      |                            |                      |                          |                      |                         |                           |                        |
| CD4 <sup>+</sup> T cells | 19.3 ± 1.04                  | 15 ± 0.56   | 0.02*                | 12 ± 0.91                  | 12 ± 0.62    | 0.80                 | 18 ± 1.2                   | 0.39                 | 13 ± 0.61                | 0.92                 | <0.0001*                | 0.048*                    | 0.004*                 |
| Th2 cells                | 1.5 ± 0.09                   | 2.2 ± 0.15  | 0.0003*              | 1.4 ± 0.21                 | 1.8 ± 0.20   | 0.20                 | 1.6 ± 0.09                 | 0.82                 | 1.2 ± 0.09               | 0.77                 | 0.99                    | 0.37                      | 0.45                   |
| Th17 cells               | 2.01 ± 0.234                 | 3.7 ± 0.35  | 0.001*               | 1.7 ± 0.32                 | 2.4 ± 0.66   | 0.75                 | 2.99 ± 0.277               | 0.04*                | 2.65 ± 1.04              | 0.61                 | 0.40                    | 1.0                       | 0.98                   |
| Tregs                    | 8.3 ± 0.29                   | 6.8 ± 0.19  | 0.005*               | 9.3 ± 0.44                 | 8.5 ± 0.73   | 0.46                 | 7.6 ± 0.37                 | 0.24                 | 9.3 ± 0.22               | 1.0                  | 0.50                    | 0.08                      | 0.06                   |
| Treg:Th2                 | 5.8 ± 0.43                   | 3.2 ± 0.21  | <0.0001*             | 8.8 ± 1.5                  | 5.4 ± 0.75   | 0.09                 | 4.9 ± 0.35                 | 0.003*               | 8.4 ± 0.88               | 0.98                 | 0.13                    | 0.42                      | 0.049*                 |
| Treg:Th17                | 5.6 ± 0.51                   | 2.9 ± 0.25  | 0.0001*              | 6.7 ± 0.80                 | 6.05 ± 1.22  | 0.89                 | 3.5 ± 0.35                 | 0.001*               | 6.19 ± 1.02              | 0.93                 | 0.01*                   | 0.13                      | 0.01*                  |
| <b>BAL cells</b>         |                              |             |                      |                            |              |                      |                            |                      |                          |                      |                         |                           |                        |
| Macrophages              | 0.24 ± 0.05                  | 0.24 ± 0.04 | 0.99                 | 0.26 ± 0.07                | 0.17 ± 0.03  | 0.63                 | 0.23 ± 0.02                | 0.98                 | 0.23 ± 0.07              | 0.94                 | 1.00                    | 0.22                      | 0.93                   |
| Eosinophils              | 0.51 ± 0.06                  | 0.55 ± 0.04 | 0.78                 | 0.62 ± 0.07                | 0.696 ± 0.15 | 0.67                 | 0.58 ± 0.02                | 0.43                 | 0.66 ± 0.07              | 0.92                 | 0.72                    | 0.03*                     | 0.35                   |
| Neutrophils              | 0.06 ± 0.01                  | 0.08 ± 0.02 | 0.40                 | 0.04 ± 0.01                | 0.06 ± 0.01  | 0.81                 | 0.09 ± 0.01                | 0.30                 | 0.05 ± 0.02              | 0.99                 | 0.99                    | 0.42                      | 0.01*                  |
| Lymphocytes              | 0.13 ± 0.02                  | 0.12 ± 0.02 | 0.95                 | 0.08 ± 0.01                | 0.07 ± 0.01  | 0.90                 | 0.09 ± 0.01                | 0.27                 | 0.07 ± 0.01              | 0.77                 | 0.09                    | 0.01*                     | 0.10                   |

**Supplemental Materials, Table S3. The percentage of immune cell populations in male and female offspring after HDM sensitization and challenge.** At maturity (6-8 weeks of age), 9-10 female and 9-10 male offspring from each developmental exposure group were sensitized and challenged with house dust mite (HDM). Within each group, offspring of the same sex were from a different treated dam. Flow cytometry was used to identify CD4<sup>+</sup> T cells in the MLN, based on the following parameters: as CD4<sup>+</sup> T cells (CD3<sup>+</sup>CD4<sup>+</sup>); Th2 cells (GATA3<sup>+</sup>CD4<sup>+</sup>); Th17 cells (RORγt<sup>+</sup>CD4<sup>+</sup>); Tregs (Foxp3<sup>+</sup>CD25<sup>+</sup>CD4<sup>+</sup>). Differential cell counting was used to enumerate eosinophils, macrophages, lymphocytes, and neutrophils in the BAL. The mean percentage of the indicated cell type ± SEM is shown. <sup>a</sup>Mixture-exposed group compared to control group within the indicated sex. <sup>b</sup>Female versus male offspring of dams given the indicated concentration of the mixture. \*Demarcates p ≤ 0.05.

| Cell type                            | Female 0.1µg/mL vs. Control |                   |                      | Male 0.1µg/mL vs. Control |                  |                      | Female 1µg/mL vs. Control |                      | Male 1µg/mL vs. Control |                      | Female vs. Male Control | Female vs. Male 0.1 µg/mL | Female vs. Male 1µg/mL |
|--------------------------------------|-----------------------------|-------------------|----------------------|---------------------------|------------------|----------------------|---------------------------|----------------------|-------------------------|----------------------|-------------------------|---------------------------|------------------------|
|                                      | Control                     | 0.1µg/mL          | P-value <sup>a</sup> | Control                   | 0.1µg/mL         | P-value <sup>a</sup> | 1µg/mL                    | P-value <sup>a</sup> | 1µg/mL                  | P-value <sup>a</sup> | p-value <sup>b</sup>    | p-value <sup>b</sup>      | p-value <sup>b</sup>   |
| Cell Number                          | 4897563 ± 944506            | 4830563 ± 1421214 | 0.99                 | 5818714 ± 1289135         | 5909625 ± 687895 | 0.99                 | 3858214 ± 1020211         | 0.81                 | 4029750 ± 525796        | 0.33                 | 0.99                    | 0.51                      | 0.69                   |
| CD4 <sup>+</sup> T cells             | 749418 ± 134060             | 736576 ± 226789   | 0.99                 | 712501 ± 150731           | 850933 ± 79669   | 0.64                 | 559500 ± 118212           | 0.72                 | 539570 ± 85843          | 0.50                 | 1.00                    | 0.64                      | 0.88                   |
| Th1 cells                            | 43093.3 ± 12678             | 34762 ± 10766     | 0.84                 | 61928.9 ± 15790           | 69719 ± 11045    | 0.87                 | 25216.2 ± 5612            | 0.47                 | 41727 ± 3981            | 0.41                 | 0.82                    | 0.04*                     | 0.03*                  |
| Th2 cells                            | 335.9 ± 101.9               | 430.9 ± 120.9     | 0.77                 | 3267.1 ± 899              | 4587 ± 519       | 0.31                 | 183.7 ± 54.8              | 0.55                 | 2915 ± 384              | 0.92                 | 0.001*                  | <0.0001*                  | <0.0001*               |
| Th17 cells                           | 12406.2 ± 3226.3            | 14386.1 ± 4379.7  | 0.91                 | 4813 ± 982                | 5059.4 ± 786     | 0.98                 | 8871 ± 1786               | 0.75                 | 4667 ± 1215             | 0.99                 | 0.31                    | 0.05                      | 0.12                   |
| Tregs                                | 79722.7 ± 15778             | 72622.8 ± 20524   | 0.96                 | 99543 ± 20971             | 103334 ± 12872   | 0.98                 | 73906.2 ± 17487           | 0.97                 | 79909 ± 11096           | 0.64                 | 0.96                    | 0.23                      | 0.60                   |
| Tfh cells                            | 2994.6 ± 923.7              | 5248.8 ± 3062     | 0.73                 | 28858 ± 8971              | 31237 ± 7782     | 0.97                 | 3739.8 ± 1654.2           | 0.97                 | 17829 ± 2785            | 0.51                 | 0.01*                   | 0.01*                     | 0.001*                 |
| CD8 <sup>+</sup> T cells             | 181834 ± 29673              | 216851 ± 74308    | 0.88                 | 572043 ± 118587           | 666815 ± 61383   | 0.71                 | 156679 ± 35859            | 0.94                 | 431571 ± 68438          | 0.48                 | 0.004*                  | 0.0004*                   | 0.002*                 |
| CTL                                  | 7429.8 ± 1693.8             | 8468.3 ± 3161.1   | 0.98                 | 76117 ± 22812             | 57961 ± 11293    | 0.64                 | 12901.9 ± 5512.5          | 0.55                 | 34918 ± 4610            | 0.13                 | 0.0004*                 | 0.001*                    | 0.02*                  |
| NP specific CD8 <sup>+</sup> T cells | 3057 ± 543                  | 3329 ± 757        | 0.98                 | 11143 ± 3012              | 9303 ± 1713      | 0.79                 | 4341 ± 1574               | 0.65                 | 6553 ± 960              | 0.19                 | 0.01*                   | 0.01*                     | 0.20                   |

**Supplemental Materials, Table S4. The number of T cell sub-populations in male and female offspring after infection.** At maturity (6-8 weeks of age), 9-10 female and 9-10 male offspring from each developmental exposure group were infected (i.n.) with influenza A virus (HKx31; H3N2). Within each group, offspring of the same sex were from a different treated dam. Flow cytometry was used to identify T cells in the MLN, based on the following parameters: CD8<sup>+</sup> T cells (CD3<sup>+</sup>CD8<sup>+</sup>); CTL (CD44<sup>hi</sup>CD62L<sup>lo</sup>CD8<sup>+</sup>); NP-specific CD8<sup>+</sup> T cells (D<sup>b</sup>NP<sub>366-374</sub><sup>+</sup>CD8<sup>+</sup>); CD4<sup>+</sup> T cells (CD3<sup>+</sup>CD4<sup>+</sup>); Th2 cells (GATA3<sup>+</sup>CD4<sup>+</sup>); Th17 cells (RORγt<sup>+</sup>CD4<sup>+</sup>); Tfh (CXCR5<sup>+</sup>PD-1<sup>+</sup> CD4<sup>+</sup>); Tregs (Foxp3<sup>+</sup>CD25<sup>+</sup>CD4<sup>+</sup>). The mean number ± SEM are shown. <sup>a</sup>Mixture-exposed group compared to control group within the indicated sex. <sup>b</sup>Female versus male offspring from dams given the indicated concentration of the mixture. \*Demarcates p ≤ 0.05.

| Cell type                            | Female 0.1 µg/mL vs. Control |               |                      | Male 0.1 µg/mL vs. Control |               |                      | Female 1 µg/mL vs. Control |                      | Male 1 µg/mL vs. Control |                      | Female vs. Male Control | Female vs. Male 0.1 µg/mL | Female vs. Male 1µg/mL |
|--------------------------------------|------------------------------|---------------|----------------------|----------------------------|---------------|----------------------|----------------------------|----------------------|--------------------------|----------------------|-------------------------|---------------------------|------------------------|
|                                      | Control                      | 0.1µg/mL      | p-value <sup>a</sup> | Control                    | 0.1µg/mL      | p-value <sup>a</sup> | 1µg/mL                     | p-value <sup>a</sup> | 1µg/mL                   | p-value <sup>a</sup> | p-value <sup>b</sup>    | p-value <sup>b</sup>      | p-value <sup>b</sup>   |
| CD4 <sup>+</sup> T cells             | 15.5 ± 1.04                  | 14.8 ± 1.18   | 0.89                 | 12.8 ± 0.850               | 15 ± 1.03     | 0.18                 | 16 ± 1.1                   | 0.93                 | 13.1 ± 0.538             | 0.97                 | 0.43                    | 1.0                       | 0.30                   |
| Th1 cells                            | 0.82 ± 0.11                  | 0.67 ± 0.14   | 0.66                 | 1.04 ± 0.101               | 1.1 ± 0.11    | 0.80                 | 0.66 ± 0.11                | 0.65                 | 1.12 ± 0.133             | 0.89                 | 0.81                    | 0.07                      | 0.12                   |
| Th2 cells                            | 0.006 ± 0.001                | 0.008 ± 0.002 | 0.58                 | 0.056 ± 0.005              | 0.079 ± 0.006 | 0.004*               | 0.005 ± 0.001              | 0.89                 | 0.073 ± 0.003            | 0.04 *               | <0.0001*                | <0.0001*                  | <0.0001*               |
| Th17 cells                           | 0.303 ± 0.111                | 0.343 ± 0.123 | 0.96                 | 0.11 ± 0.03                | 0.09 ± 0.02   | 0.88                 | 0.31 ± 0.08                | 0.99                 | 0.11 ± 0.02              | 0.99                 | 0.53                    | 0.22                      | 0.48                   |
| Tregs                                | 1.6 ± 0.18                   | 1.5 ± 0.14    | 0.91                 | 1.8 ± 0.11                 | 1.8 ± 0.13    | 0.99                 | 2.1 ± 0.19                 | 0.19                 | 2.05 ± 0.234             | 0.58                 | 0.98                    | 0.90                      | 1.0                    |
| Tfh cells                            | 0.06 ± 0.02                  | 0.07 ± 0.02   | 0.77                 | 0.44 ± 0.08                | 0.48 ± 0.08   | 0.93                 | 0.07 ± 0.02                | 0.89                 | 0.45 ± 0.06              | 0.99                 | <0.0001*                | <0.0001*                  | 0.0001*                |
| CD8 <sup>+</sup> T cells             | 3.9 ± 0.41                   | 4.1 ± 0.45    | 0.90                 | 10.4 ± 0.835               | 11.7 ± 0.635  | 0.40                 | 4.4 ± 0.26                 | 0.67                 | 10.5 ± 0.498             | 0.99                 | <0.0001*                | <0.0001*                  | <0.0001*               |
| CTL                                  | 0.15 ± 0.01                  | 0.15 ± 0.02   | 0.99                 | 1.2 ± 0.25                 | 0.94 ± 0.13   | 0.56                 | 0.26 ± 0.07                | 0.10                 | 0.995 ± 0.212            | 0.69                 | <0.0001*                | 0.003*                    | 0.01*                  |
| NP specific CD8 <sup>+</sup> T cells | 0.065 ± 0.004                | 0.08 ± 0.01   | 0.44                 | 0.22 ± 0.04                | 0.16 ± 0.02   | 0.29                 | 0.11 ± 0.01                | 0.005*               | 0.16 ± 0.01              | 0.35                 | <0.0001*                | 0.08                      | 0.53                   |

**Supplemental Materials, Table S5. The percentage of T cell sub-populations in male and female offspring after infection.** At maturity (6-8 weeks of age), 9-10 female and 9-10 male offspring from each developmental exposure group were infected (i.n.) with influenza A virus (HKx31; H3N2). Within each group, offspring of the same sex were from a different treated dam. Flow cytometry was used to identify the indicated T cell types in the MLN, based on the following parameters: CD8<sup>+</sup> T cells (CD3<sup>+</sup>CD8<sup>+</sup>); CTL (CD44<sup>hi</sup>CD62L<sup>lo</sup>CD8<sup>+</sup>); NP-specific CD8<sup>+</sup> T cells (D<sup>b</sup>NP<sub>366-374</sub><sup>+</sup>CD8<sup>+</sup>); CD4<sup>+</sup> T cells (CD3<sup>+</sup>CD4<sup>+</sup>); Th2 cells (GATA3<sup>+</sup>CD4<sup>+</sup>); Th17 cells (RORγt<sup>+</sup>CD4<sup>+</sup>); Tfh (CXCR5<sup>+</sup>PD-1<sup>+</sup>CD4<sup>+</sup>); Tregs (Foxp3<sup>+</sup>CD25<sup>+</sup>CD4<sup>+</sup>). The mean percentage ± SEM is shown. <sup>a</sup>Mixture-exposed group compared to control group within the indicated sex. <sup>b</sup>Female versus male offspring from dams given the indicated concentration of the mixture. \*Demarcates p ≤ 0.05.

| Cell type                | Female 0.1µg/mL vs. Control |                    |                      | Male 0.1µg/mL vs. Control |                    |                      | Female 1µg/mL vs. Control |                      | Male 1µg/mL vs. Control |                      | Female vs. Male Control | Female vs. Male 0.1 µg/mL | Female vs. Male 1µg/mL |
|--------------------------|-----------------------------|--------------------|----------------------|---------------------------|--------------------|----------------------|---------------------------|----------------------|-------------------------|----------------------|-------------------------|---------------------------|------------------------|
|                          | Control                     | 0.1µg/mL           | p-value <sup>a</sup> | Control                   | 0.1µg/mL           | p-value <sup>a</sup> | p-value <sup>b</sup>      | p-value <sup>a</sup> | 1µg/mL                  | p-value <sup>a</sup> | p-value <sup>b</sup>    | p-value <sup>b</sup>      | p-value <sup>b</sup>   |
| <b>DAY 7</b>             |                             |                    |                      |                           |                    |                      |                           |                      |                         |                      |                         |                           |                        |
| MLN cells                | 9978571 ± 1246035           | 13037500 ± 1031675 | 0.21                 | 11778571 ± 1486431        | 13103125 ± 1663959 | 0.74                 | 13396875 ± 1605984        | 0.15                 | 11818750 ± 1030622      | 0.99                 | 0.95                    | 0.92                      | 0.41                   |
| CD4 <sup>+</sup> T cells | 1525836 ± 219598            | 1658047 ± 188466   | 0.91                 | 1803307 ± 183874          | 2005097 ± 305007   | 0.84                 | 1970091 ± 257145          | 0.37                 | 1748992 ± 222254        | 0.99                 | 0.97                    | 0.90                      | 0.98                   |
| Th1 cells                | 90810 ± 30735               | 162232 ± 34164     | 0.22                 | 50130 ± 13281             | 37254 ± 5272       | 0.58                 | 94160 ± 19381             | 0.99                 | 41334 ± 7628            | 0.77                 | 0.79                    | 0.01*                     | 0.52                   |
| Th2 cells                | 1673 ± 337                  | 1313 ± 185         | 0.81                 | 1770 ± 224                | 2815 ± 974         | 0.48                 | 1997 ± 566                | 0.84                 | 1279.9 ± 224.2          | 0.19                 | 1.00                    | 0.27                      | 0.91                   |
| Th17 cells               | 69154 ± 5892                | 72420 ± 15035      | 0.99                 | 74398 ± 6687              | 80427 ± 8591       | 0.88                 | 116230 ± 22938            | 0.15                 | 78659 ± 10310           | 0.94                 | 0.99                    | 1.0                       | 0.36                   |
| Tregs                    | 130587 ± 16380              | 159616 ± 19831     | 0.68                 | 160451 ± 15644            | 213183 ± 31461     | 0.28                 | 200500 ± 31538            | 0.13                 | 163910 ± 17532          | 0.99                 | 0.96                    | 0.83                      | 0.88                   |
| <b>DAY 21</b>            |                             |                    |                      |                           |                    |                      |                           |                      |                         |                      |                         |                           |                        |
| MLN cells                | 13103571 ± 1545669          | 12406594 ± 1380055 | 0.96                 | 11545625 ± 2873425        | 10905625 ± 2157050 | 0.98                 | 14875313 ± 2150489        | 0.76                 | 14059375 ± 2080860      | 0.74                 | 0.86                    | 0.99                      | 0.99                   |
| CD4 <sup>+</sup> T cells | 2135186 ± 280250            | 1729275 ± 192064   | 0.58                 | 1688515 ± 353411          | 1567659 ± 287275   | 0.96                 | 2364883 ± 1615598         | 0.84                 | 2050241 ± 283712        | 0.69                 | 0.48                    | 0.99                      | 0.81                   |
| Th1 cells                | 67862 ± 16381               | 94961 ± 24133      | 0.57                 | 19248 ± 4454              | 20392 ± 5197       | 0.99                 | 65723 ± 12496             | 0.99                 | 28353 ± 4974            | 0.40                 | 0.05                    | 0.95                      | 0.89                   |
| Th2 cells                | 2177 ± 349                  | 1234 ± 153         | 0.09                 | 415 ± 115                 | 375 ± 94           | 0.97                 | 1882 ± 365                | 0.77                 | 611 ± 144               | 0.49                 | 0.0003*                 | 0.52                      | 0.13                   |
| Th17 cells               | 123129 ± 21883              | 91393 ± 11430      | 0.51                 | 55322 ± 17380             | 53921 ± 13712      | 0.99                 | 141889 ± 24496            | 0.79                 | 85498 ± 15768           | 0.38                 | 0.02*                   | 0.60                      | 0.21                   |
| Tregs                    | 233309 ± 36518              | 193893 ± 25318     | 0.73                 | 231943 ± 53240            | 217953 ± 42181     | 0.97                 | 270879 ± 44271            | 0.75                 | 283672 ± 40044          | 0.71                 | 0.74                    | 1.0                       | 0.97                   |
| <b>DAY 42</b>            |                             |                    |                      |                           |                    |                      |                           |                      |                         |                      |                         |                           |                        |
| MLN cells                | 16756250 ± 3019859          | 15902778 ± 2171435 | 0.96                 | 9770000 ± 1710798         | 23322222 ± 3489954 | 0.002*               | 18863889 ± 1647874        | 0.80                 | 15780500 ± 2086808      | 0.21                 | 0.34                    | 0.27                      | 0.94                   |
| CD4 <sup>+</sup> T cells | 3006056 ± 546306            | 2827342 ± 410654   | 0.95                 | 1710725 ± 277970          | 3362214 ± 484674   | 0.01*                | 3462128 ± 279403          | 0.73                 | 2379627 ± 282119        | 0.37                 | 0.19                    | 0.92                      | 0.34                   |
| Th1 cells                | 112823 ± 28704              | 92899 ± 16695      | 0.77                 | 71941 ± 14380             | 186874 ± 34465     | 0.02*                | 108376 ± 14302            | 0.99                 | 117446 ± 30449          | 0.46                 | 0.85                    | 0.10                      | 0.99                   |
| Th2 cells                | 1918 ± 388                  | 1198 ± 186         | 0.25                 | 890 ± 185                 | 1595 ± 276         | 0.05                 | 2118 ± 326                | 0.89                 | 1020 ± 133              | 0.89                 | 0.07                    | 0.88                      | 0.03*                  |
| Th17 cells               | 172501 ± 26431              | 174585 ± 30157     | 0.99                 | 37338 ± 9751              | 81499 ± 10623      | 0.01*                | 183473 ± 19926            | 0.95                 | 64574 ± 10246           | 0.15                 | 0.0001*                 | 0.01*                     | 0.001*                 |
| Tregs                    | 368823 ± 59889              | 365668 ± 47395     | 0.99                 | 228291 ± 37780            | 442805 ± 60917     | 0.01*                | 457275 ± 36033            | 0.41                 | 329128 ± 40734          | 0.28                 | 0.32                    | 0.86                      | 0.38                   |

**Supplemental Materials, Table S6. The number of CD4<sup>+</sup> T cell subsets in developmentally exposed mice after MOG peptide administration.**

At maturity (6-8 weeks of age), EAE was induced in 8-10 female and 8-10 male offspring from each developmental exposure group. Within each group, offspring of the same sex were from a different treated dam. Mice were sacrificed 7, 21 or 42 days after MOG peptide administration, and flow cytometry was used to identify CD4<sup>+</sup> T cells in the cervical lymph nodes, based on the following parameters: CD4<sup>+</sup> T cells (CD3<sup>+</sup>CD4<sup>+</sup>); Th1 cells (Tbet<sup>+</sup>CD4<sup>+</sup>); Th2 cells (GATA3<sup>+</sup>CD4<sup>+</sup>); Th17 cells (RORγt<sup>+</sup>CD4<sup>+</sup>); Treg (Foxp3<sup>+</sup>CD25<sup>+</sup>CD4<sup>+</sup>). The mean percentage ± SEM is shown.

<sup>a</sup>Mixture-exposed group compared to control group within the indicated sex. <sup>b</sup>Female versus male offspring from dams given the indicated concentration of the mixture. \*Demarcates  $p \leq 0.05$ .

|                          | Female 0.1µg/mL vs. Control |               |                      | Male 0.1µg/mL vs. Control |               |                      | Female 1µg/mL vs. Control |                      | Male 1µg/mL vs. Control |                      | Female vs. Male Control | Female vs. Male 0.1 µg/mL | Female vs. Male 1µg/mL |
|--------------------------|-----------------------------|---------------|----------------------|---------------------------|---------------|----------------------|---------------------------|----------------------|-------------------------|----------------------|-------------------------|---------------------------|------------------------|
| Cell type                | Control                     | 0.1µg/mL      | P-value <sup>a</sup> | Control                   | 0.1µg/mL      | P-value <sup>a</sup> | 1µg/mL                    | P-value <sup>a</sup> | 1µg/mL                  | P-value <sup>a</sup> | p-value <sup>b</sup>    | p-value <sup>b</sup>      | p-value <sup>b</sup>   |
| <b>DAY 7</b>             |                             |               |                      |                           |               |                      |                           |                      |                         |                      |                         |                           |                        |
| CD4 <sup>+</sup> T cells | 15 ± 0.67                   | 13 ± 0.49     | 0.03*                | 16 ± 1.7                  | 15 ± 0.69     | 0.87                 | 15 ± 0.71                 | 0.93                 | 15 ± 1.2                | 0.76                 | 0.98                    | 0.57                      | 1.0                    |
| Th1 cells                | 0.86 ± 0.25                 | 1.3 ± 0.28    | 0.47                 | 0.42 ± 0.09               | 0.29 ± 0.03   | 0.24                 | 0.698 ± 0.142             | 0.87                 | 0.33 ± 0.03             | 0.52                 | 0.33                    | 0.01*                     | 0.68                   |
| Th2 cells                | 0.017 ± 0.002               | 0.010 ± 0.001 | 0.08                 | 0.016 ± 0.002             | 0.018 ± 0.004 | 0.82                 | 0.015 ± 0.003             | 0.77                 | 0.011 ± 0.001           | 0.49                 | 0.99                    | 0.23                      | 0.84                   |
| Th17 cells               | 0.75 ± 0.06                 | 0.54 ± 0.09   | 0.21                 | 0.67 ± 0.07               | 0.63 ± 0.04   | 0.89                 | 0.86 ± 0.09               | 0.61                 | 0.67 ± 0.06             | 0.99                 | 0.99                    | 0.99                      | 0.47                   |
| Tregs                    | 1.3 ± 0.04                  | 1.2 ± 0.09    | 0.77                 | 1.5 ± 0.17                | 1.6 ± 0.07    | 0.68                 | 1.5 ± 0.11                | 0.34                 | 1.4 ± 1.1               | 0.97                 | 0.95                    | 0.65                      | 0.99                   |
| Treg:Th1                 | 2.9 ± 0.78                  | 1.2 ± 0.18    | 0.15                 | 4.3 ± 0.79                | 6.1 ± 0.84    | 0.20                 | 2.9 ± 0.67                | 0.99                 | 4.5 ± 0.53              | 0.97                 | 0.65                    | 0.01*                     | 0.72                   |
| Treg:Th2                 | 84 ± 10                     | 126 ± 12      | 0.34                 | 95 ± 9.2                  | 116 ± 19      | 0.66                 | 133 ± 33                  | 0.24                 | 143 ± 18                | 0.13                 | 0.99                    | 0.97                      | 0.99                   |
| Treg:Th17                | 1.8 ± 0.14                  | 2.6 ± 0.32    | 0.05                 | 2.2 ± 0.19                | 2.6 ± 0.19    | 0.41                 | 1.8 ± 0.15                | 0.99                 | 2.2 ± 0.29              | 0.98                 | 0.94                    | 0.99                      | 0.70                   |
| <b>DAY 21</b>            |                             |               |                      |                           |               |                      |                           |                      |                         |                      |                         |                           |                        |
| CD4 <sup>+</sup> T cells | 16 ± 0.57                   | 14 ± 0.65     | 0.15                 | 16 ± 1.2                  | 15 ± 0.69     | 0.56                 | 16 ± 0.62                 | 0.99                 | 15 ± 0.71               | 0.62                 | 0.94                    | 0.82                      | 0.26                   |
| Th1 cells                | 4.1 ± 1.1                   | 5.8 ± 1.7     | 0.57                 | 1.1 ± 0.14                | 1.2 ± 0.13    | 0.96                 | 3.2 ± 0.73                | 0.88                 | 1.5 ± 0.39              | 0.50                 | 0.50                    | 0.69                      | 0.98                   |
| Th2 cells                | 0.11 ± 0.01                 | 0.07 ± 0.01   | 0.04*                | 0.027 ± 0.005             | 0.022 ± 0.003 | 0.68                 | 0.08 ± 0.01               | 0.24                 | 0.029 ± 0.004           | 0.87                 | <0.0001*                | 0.03*                     | 0.04*                  |
| Th17 cells               | 5.7 ± 0.38                  | 5.3 ± 0.46    | 0.79                 | 2.9 ± 0.41                | 3.4 ± 0.38    | 0.61                 | 6.04 ± 0.378              | 0.82                 | 4.1 ± 0.32              | 0.09                 | <0.0001*                | <0.0001*                  | 0.0001*                |
| Tregs                    | 10.5 ± 0.608                | 11 ± 0.56     | 0.76                 | 13 ± 0.47                 | 14 ± 0.39     | 0.67                 | 11 ± 0.47                 | 0.54                 | 14 ± 0.64               | 0.75                 | 0.84                    | 0.99                      | 0.93                   |
| Treg:Th1                 | 5.2 ± 0.85                  | 5.23 ± 1.2    | 1.0                  | 13 ± 1.3                  | 13 ± 1.5      | 0.98                 | 6.04 ± 0.954              | 0.84                 | 11 ± 1.4                | 0.73                 | 0.07                    | 0.41                      | 0.78                   |
| Treg:Th2                 | 122 ± 23                    | 168 ± 16      | 0.40                 | 739 ± 232                 | 720 ± 102     | 0.99                 | 194 ± 32                  | 0.11                 | 541 ± 75                | 0.64                 | 0.01*                   | 0.03*                     | 0.47                   |
| Treg:Th17                | 1.9 ± 0.10                  | 2.3 ± 0.73    | 0.13                 | 5.2 ± 0.63                | 4.5 ± 0.51    | 0.59                 | 1.96 ± 0.113              | 0.95                 | 3.5 ± 0.28              | 0.07                 | <0.0001*                | 0.0004*                   | 0.10                   |
| <b>DAY 42</b>            |                             |               |                      |                           |               |                      |                           |                      |                         |                      |                         |                           |                        |
| CD4 <sup>+</sup> T cells | 18 ± 0.57                   | 17.8 ± 0.951  | 0.92                 | 18 ± 1.3                  | 15 ± 0.95     | 0.06                 | 18 ± 0.32                 | 0.95                 | 16 ± 0.77               | 0.18                 | 1.00                    | 0.20                      | 0.22                   |
| Th1 cells                | 3.4 ± 0.34                  | 3.2 ± 0.32    | 0.83                 | 4.2 ± 0.61                | 5.5 ± 0.54    | 0.41                 | 3.1 ± 0.22                | 0.71                 | 4.7 ± 0.87              | 0.87                 | 0.92                    | 0.35                      | 0.82                   |
| Th2 cells                | 0.06 ± 0.01                 | 0.04 ± 0.01   | 0.06                 | 0.01 ± 0.01               | 0.047 ± 0.003 | 0.69                 | 0.06 ± 0.01               | 0.79                 | 0.044 ± 0.003           | 0.44                 | 0.92                    | 0.99                      | 0.08                   |
| Th17 cells               | 6.01 ± 0.384                | 6.03 ± 0.364  | 0.99                 | 2.03 ± 0.260              | 2.5 ± 0.28    | 0.47                 | 5.3 ± 0.43                | 0.44                 | 2.7 ± 0.32              | 0.28                 | <0.0001*                | <0.0001*                  | <0.0001*               |
| Tregs                    | 13 ± 0.71                   | 13 ± 0.37     | 0.79                 | 13 ± 0.26                 | 13 ± 0.34     | 0.99                 | 13 ± 0.34                 | 0.78                 | 14 ± 0.43               | 0.64                 | 0.95                    | 0.34                      | 0.51                   |
| Treg:Th1                 | 4.01 ± 0.445                | 4.5 ± 0.46    | 0.69                 | 3.8 ± 0.56                | 2.7 ± 0.35    | 0.24                 | 4.4 ± 0.31                | 0.74                 | 3.6 ± 0.45              | 0.94                 | 0.99                    | 0.07                      | 0.74                   |
| Treg:Th2                 | 217 ± 25                    | 343 ± 49      | 0.09                 | 324 ± 60                  | 298 ± 25      | 0.89                 | 256 ± 38                  | 0.77                 | 330 ± 24                | 0.89                 | 0.44                    | 0.97                      | 0.78                   |
| Treg:Th17                | 2.1 ± 0.07                  | 2.3 ± 0.21    | 0.82                 | 7.8 ± 1.1                 | 5.7 ± 0.47    | 0.22                 | 2.6 ± 0.19                | 0.16                 | 5.9 ± 0.73              | 0.27                 | <0.0001*                | 0.01*                     | 0.01*                  |

**Supplemental Materials, Table S7. The percentage of CD4<sup>+</sup> T cell subsets in developmentally exposed mice after MOG peptide administration.** At maturity (6-8 weeks of age), EAE was induced in 8-10 female and 8-10 male offspring from each developmental exposure group. Within each group, offspring of the same sex were from a different treated dam. Mice were sacrificed 7, 21 or 42 days after MOG peptide administration, and flow cytometry was used to identify CD4<sup>+</sup> T cells in the cervical lymph nodes, based on the following parameters: CD4<sup>+</sup> T cells (CD3<sup>+</sup>CD4<sup>+</sup>); Th1 cells (Tbet<sup>+</sup>CD4<sup>+</sup>); Th2 cells (GATA3<sup>+</sup>CD4<sup>+</sup>); Th17 cells (RORγt<sup>+</sup>CD4<sup>+</sup>); Treg (Foxp3<sup>+</sup>CD25<sup>+</sup>CD4<sup>+</sup>). The mean percentage ± SEM is shown. <sup>a</sup>Mixture-exposed group compared to control group within the indicated sex. <sup>b</sup>Female versus male offspring from dams given the indicated concentration of the mixture. \*Demarcates p ≤ 0.05.



### A. Female offspring

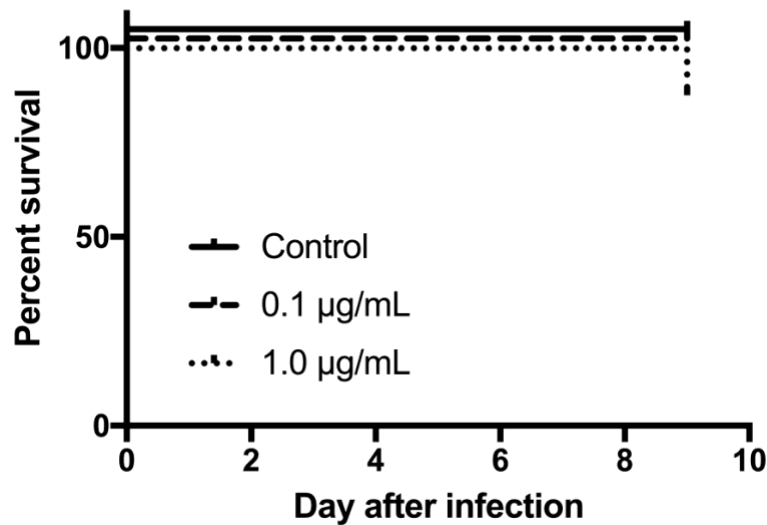

### B. Male offspring

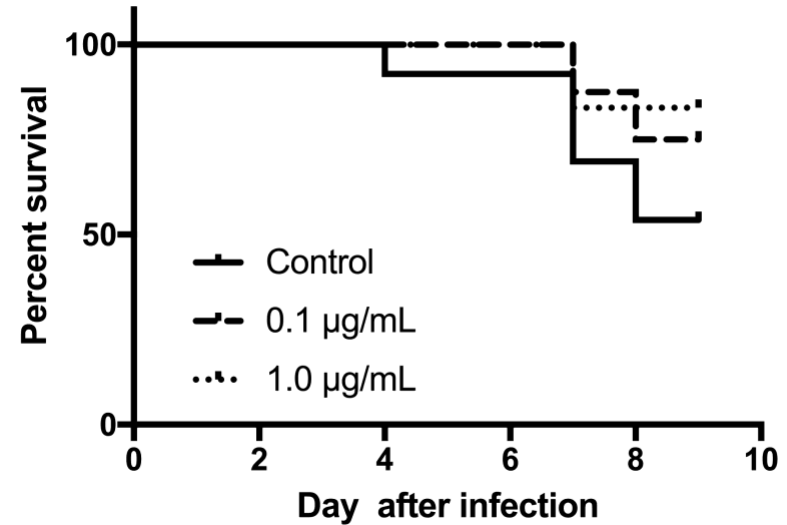

**Supplemental Materials, Figure S1. Effects of developmental exposure to chemicals associated with UOG on survival following primary influenza virus infection.** At maturity (6-8 weeks of age), 9-10 female and 9-10 male offspring from each exposure group infected with influenza A virus (HKx31; H3N2). Within each group, offspring of the same sex were from a different treated dam. Post infection survival for (A) female and (B) male offspring was recorded daily for 9 days. There were no statistically significant differences in survival among same sex offspring.
